# Supplementary material for: Coordinated Loss and Acquisition of NK Cell Surface Markers Accompanied by Generalized Cytokine Dysregulation in COVID-19
Source: MDPI journal article supplement (doi:10.3390/ijms24031996), 2023-01-19
Supplement: s1 [file s1]

Supplementary Table S1. The panels of fluorochrome-conjugated monoclonal antibodies, which were used in the study.

|            | <b>Panel 1</b> | <b>Panel 2</b> | <b>Panel 3</b> | <b>Panel 4</b> | <b>Panel 5</b> | <b>Panel 6</b> |
|------------|----------------|----------------|----------------|----------------|----------------|----------------|
| VioBlue    | CD3            | CD3            |                | CD3            | CD45           | CD107a         |
| FITC       | NKG2C          |                | CD3            |                | NKG2C          | CD3            |
| PE         | NKG2A          | NKp30          | NKG2D          | HLA-DR         |                |                |
| PerCP      | CD45           | CD45           | CD45           | CD45           | CD3            | CD45           |
| PE-Cy7     | CD14           | CD14           | CD14           | CD14           | CD14           | CD14           |
| APC        | CD57           | KIR2DL2/3      | CD16           | PD-1           | Granzyme B     | CD56           |
| APC-Vio770 | CD56           | CD56           | CD56           | CD56           | CD56           |                |

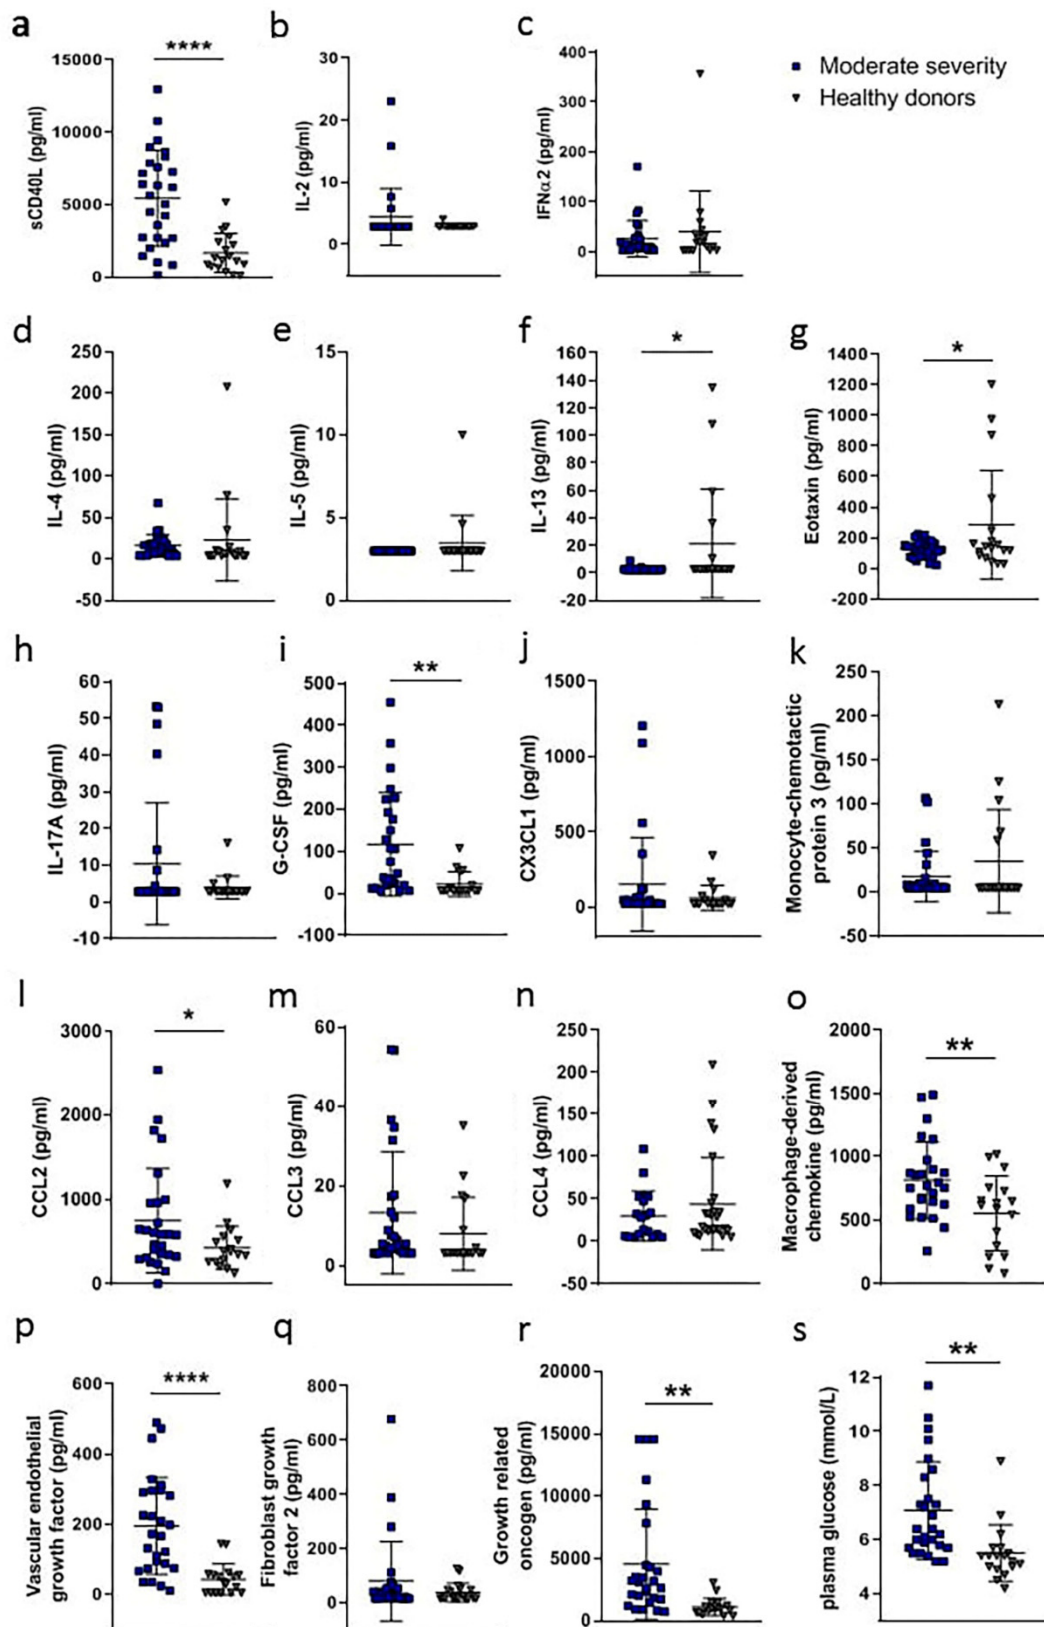

Supplementary Figure S1. Concentration of (a) sCD40L, (b) IL-2, (c) IFNα2, (d) IL-4, (e) IL-5, (f) IL-13, (g) Eotaxin, (h) IL-17A, (i) G-CSF, (j) CX3CL1, (k) MCP3, (l) CCL2, (m) CCL3, (n) CCL4, (o) MDC, (p) VEGF, (q) FGF2, (r) GRO in pg/ml in serum of healthy donors and patients with moderate COVID-19 measured with MagPix assay. (s) concentration of plasma glucose (mmol/L) measured with glucometer. \*p<0.05, \*\*p<0.01, \*\*\*\*p<0.0001.

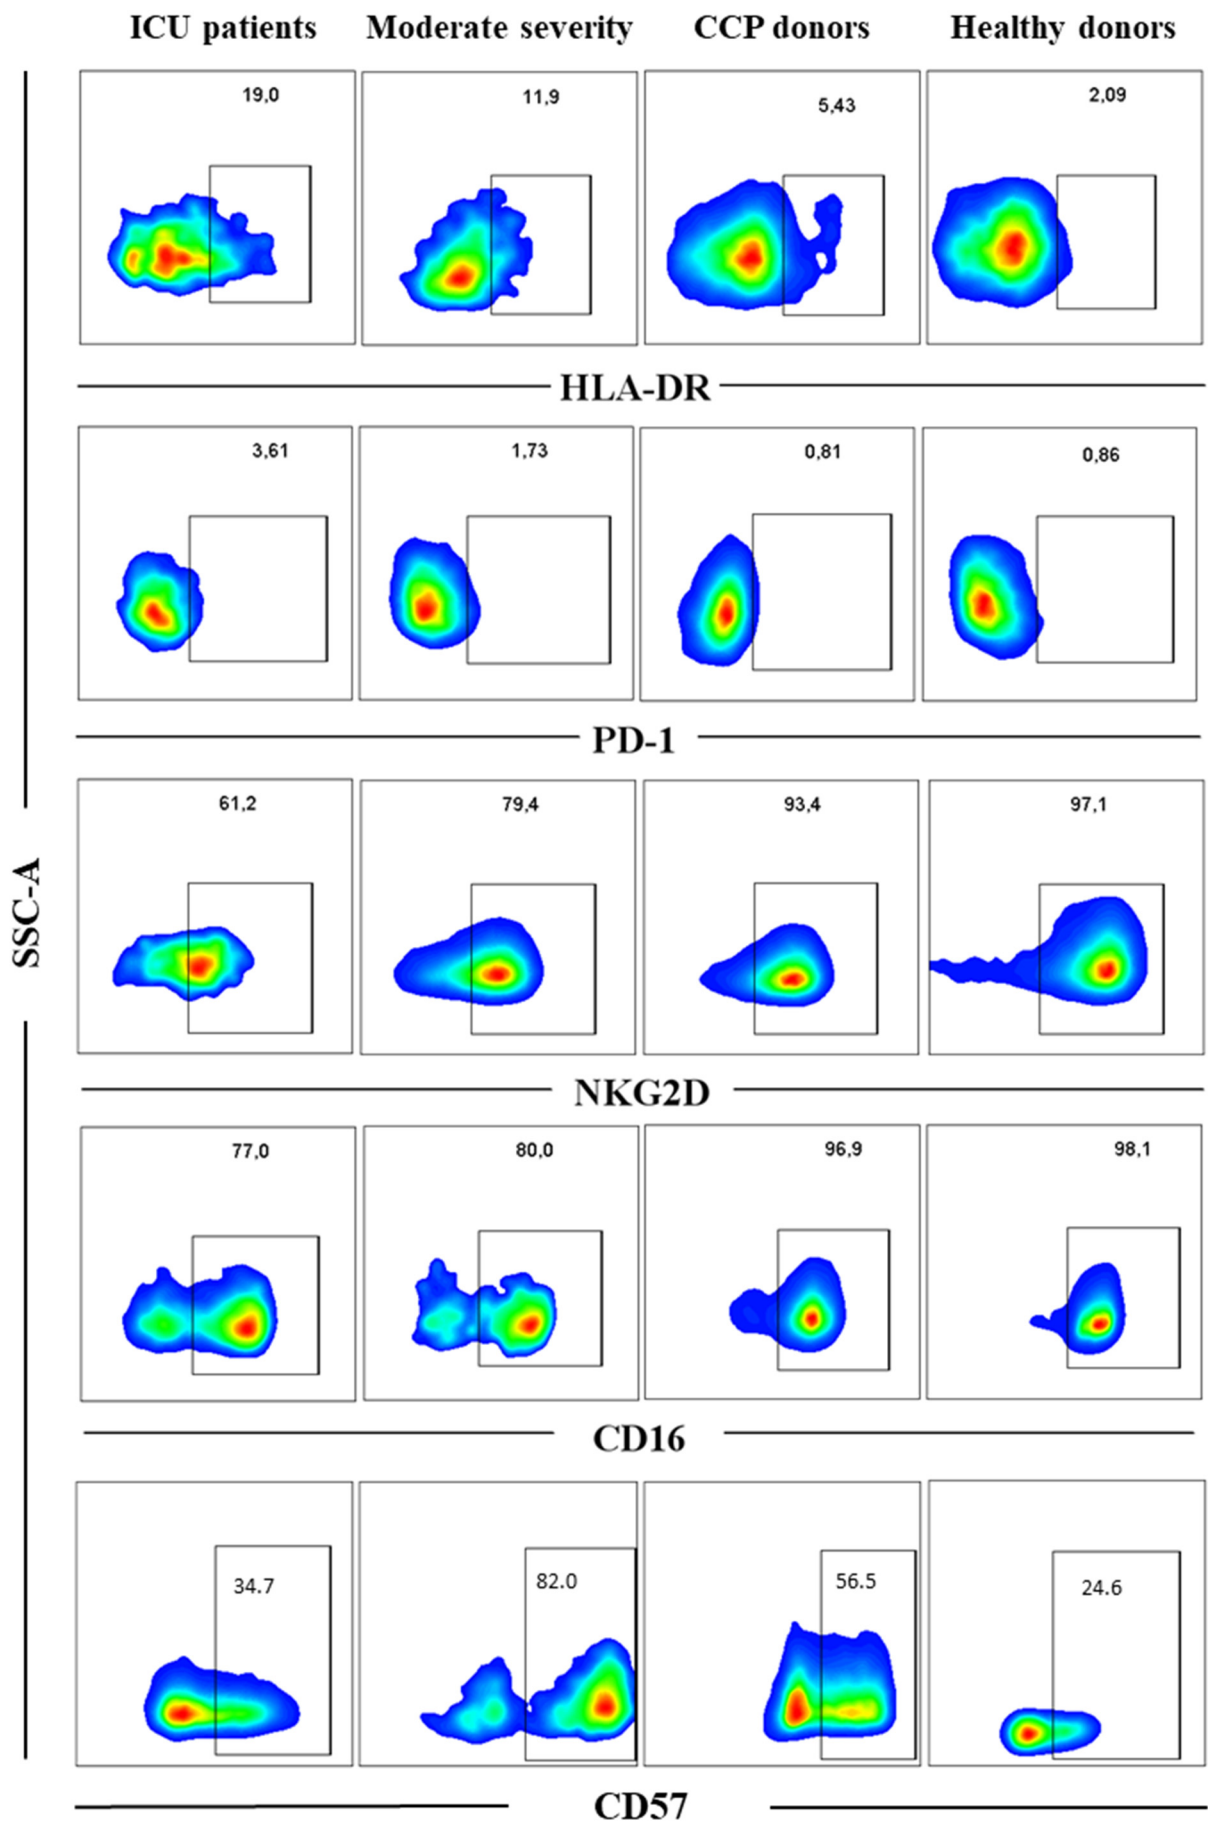

Supplementary Figure S2. Representative expression of phenotypic markers (HLA-DR, PD-1, NKG2D, CD16, CD57) on NK cells from ICU patients, moderate severity patients, CCP donors and healthy donors.

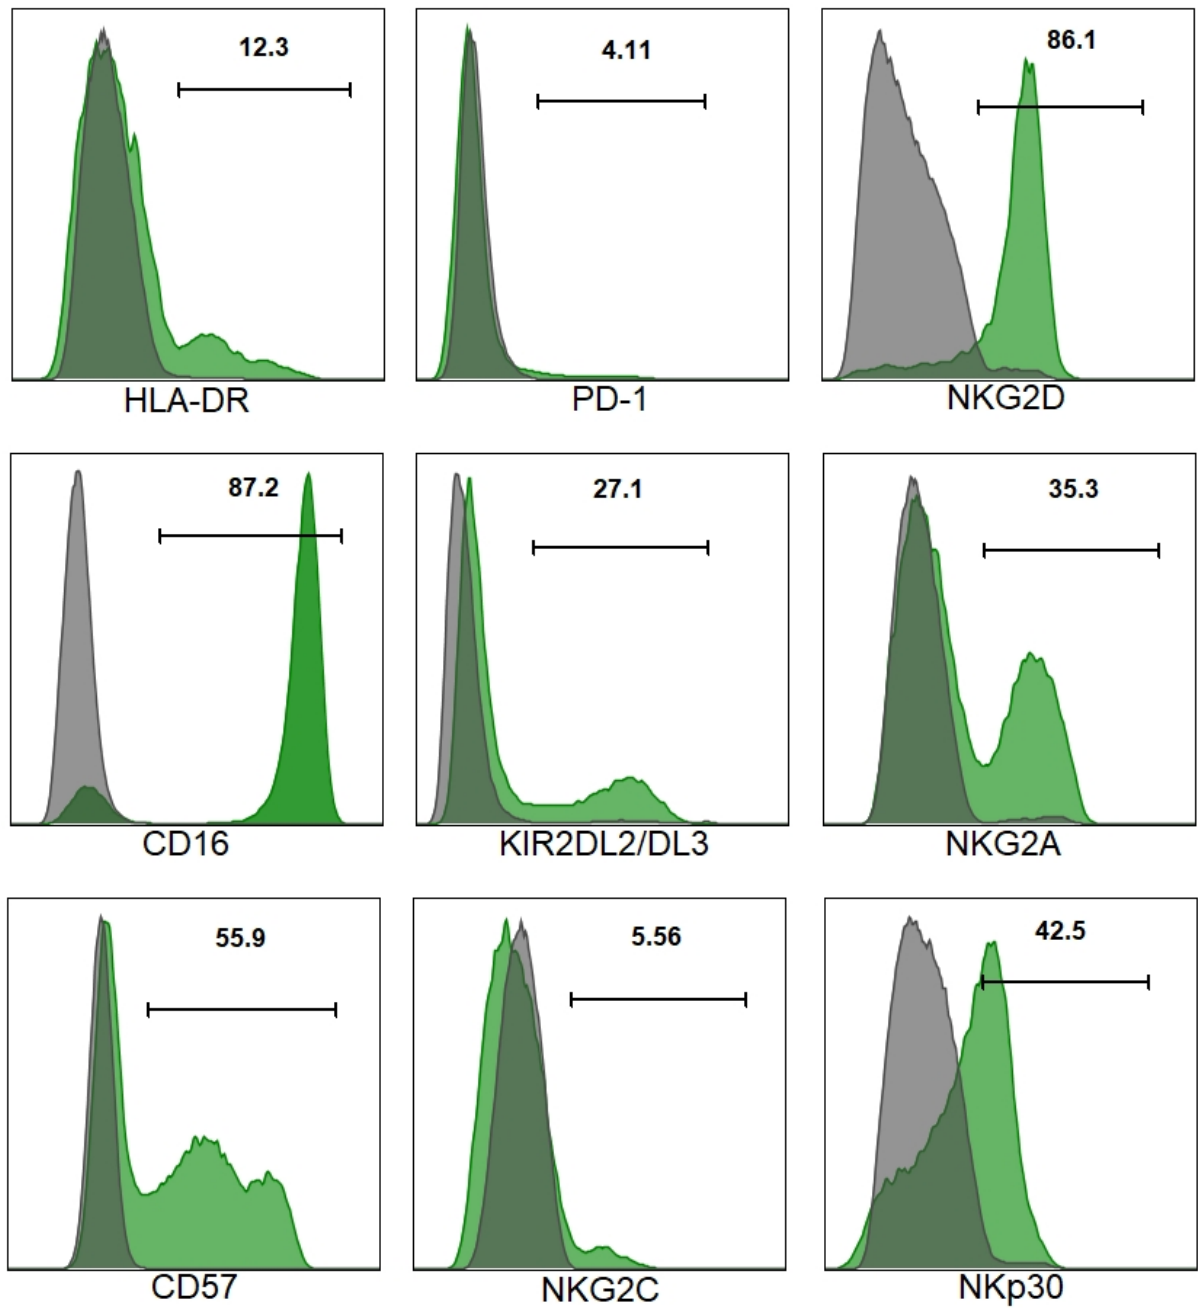

Supplementary Figure S3. FMO (fluorescence minus one) controls (grey) presented as a histogram for HLA-DR-PE, PD-1-Alexa Flour 647, NKG2D-PE, CD16-APC, KIR2DL2/DL3-APC, NKG2A-PE, CD57-APC, NKG2C-FITC, and NKp30-PE (green).
